# Supplementary material for: An unprecedented protocol for the synthesis of 3-hydroxy-3-phenacyloxindole derivatives with indolin-2-ones and α-substituted ketones
Source: Royal Society of Chemistry journal article supplement (doi:10.1039/c5ob02391b), 2015-12-09

# An unprecedented protocol for the synthesis of 3-hydroxy-3-phenacyloxindole derivatives with indolin-2-ones and $\alpha$ -substituted ketones

Mei Bai,<sup>a,b,c</sup> Yong You,<sup>a,c</sup> Yong-Zheng Chen,<sup>b,\*</sup> Guang-Yan Xiang,<sup>b</sup> Xiao-Ying Xu,<sup>a</sup> Xiao-Mei Zhang,<sup>a</sup> Wei-Cheng Yuan<sup>a,\*</sup>

<sup>a</sup>National Engineering Research Center of Chiral Drugs, Chengdu Institute of Organic Chemistry, Chinese Academy of Sciences, Chengdu 610041, China

<sup>b</sup>School of Pharmacy, Zunyi Medical University, Zunyi, 563000, China

<sup>c</sup>University of Chinese Academy of Sciences, Beijing, 100049, China

\*E-mail: yuanwc@cioc.ac.cn

\*E-mail: yzchen@zmc.edu.cn

## Supporting Information

### Table of Contents

|                                                                                               |    |
|-----------------------------------------------------------------------------------------------|----|
| 1. X-ray crystallographic data of compound <b>3a</b> .....                                    | S1 |
| 2. Mass Spectrum of hydroperoxide oxindoles <b>5</b> in the proposed pathway.....             | S1 |
| 3. <sup>1</sup> H NMR of 3-monosubstituted oxindole <b>4</b> in the proposed pathway.....     | S2 |
| 4. The copies of <sup>1</sup> H NMR, <sup>13</sup> C NMR spectra for compounds <b>3</b> ..... | S2 |

## 1. X-ray crystallographic data of compound 3a (CCDC: 1437932)

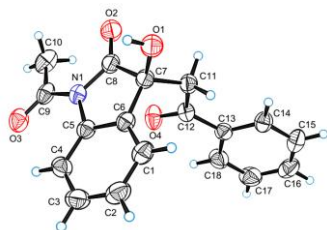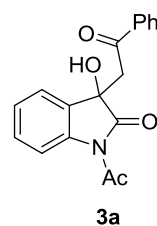

|                                             |                                                               |
|---------------------------------------------|---------------------------------------------------------------|
| Empirical formula                           | C <sub>18</sub> H <sub>15</sub> NO <sub>4</sub>               |
| Formula weight                              | 309.31                                                        |
| Temperature/K                               | 289(2)                                                        |
| Crystal system                              | monoclinic                                                    |
| Space group                                 | P2 <sub>1</sub> /c                                            |
| a/Å, b/Å, c/Å                               | 11.1239(3), 8.9956(2), 15.6586(4)                             |
| α/°, β/°, γ/°                               | 90, 105.218(2), 90                                            |
| Volume/Å <sup>3</sup>                       | 1511.95(7)                                                    |
| Z                                           | 4                                                             |
| ρ <sub>calc</sub> /cm <sup>3</sup>          | 1.359                                                         |
| μ/mm <sup>-1</sup>                          | 0.798                                                         |
| F(000)                                      | 648.0                                                         |
| Crystal size/mm <sup>3</sup>                | 0.28 × 0.24 × 0.2                                             |
| Radiation                                   | CuKα (λ = 1.54184)                                            |
| 2θ range for data collection                | 12.432 to 139.398                                             |
| Index ranges                                | -13 ≤ h ≤ 13, -10 ≤ k ≤ 9, -18 ≤ l ≤ 12                       |
| Reflections collected                       | 6820                                                          |
| Independent reflections                     | 2747 [R <sub>int</sub> = 0.0135, R <sub>sigma</sub> = 0.0143] |
| Data/restraints/parameters                  | 2747/0/210                                                    |
| Goodness-of-fit on F <sup>2</sup>           | 1.065                                                         |
| Final R indexes [I ≥ 2σ (I)]                | R <sub>1</sub> = 0.0422, wR <sub>2</sub> = 0.1106             |
| Final R indexes [all data]                  | R <sub>1</sub> = 0.0450, wR <sub>2</sub> = 0.1128             |
| Largest diff. peak/hole / e Å <sup>-3</sup> | 0.19/-0.15                                                    |

## 2. Mass Spectrum of hydroperoxide oxindoles 5 in the proposed pathway

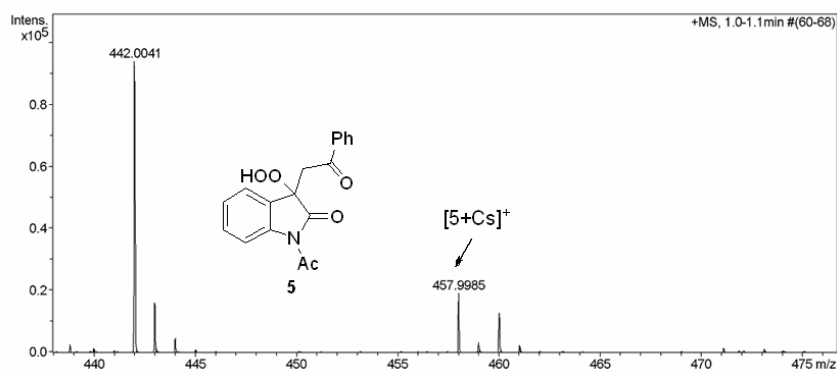

3.  $^1\text{H}$  NMR of 3-monosubstituted oxindole 4 in the proposed pathway

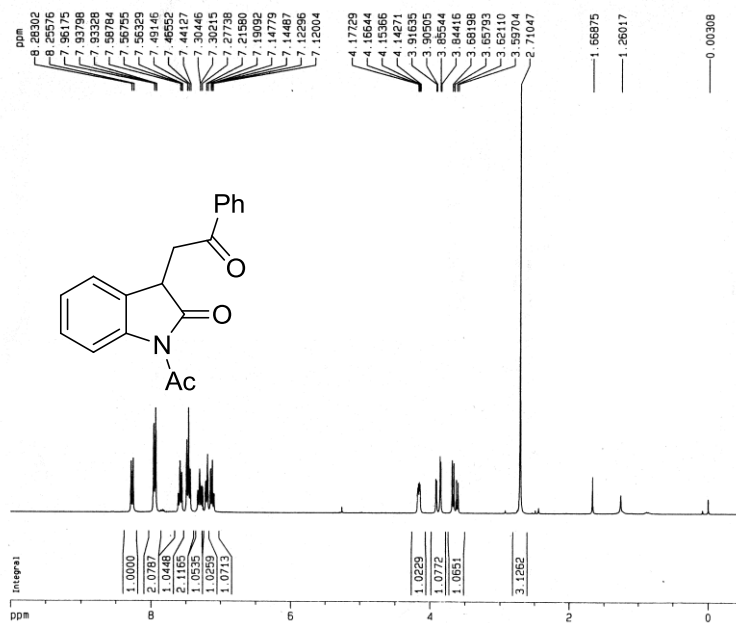

4. The copies of  $^1\text{H}$  NMR,  $^{13}\text{C}$  NMR spectra for compounds 3  
 $^1\text{H}$  and  $^{13}\text{C}$  NMR of 3a

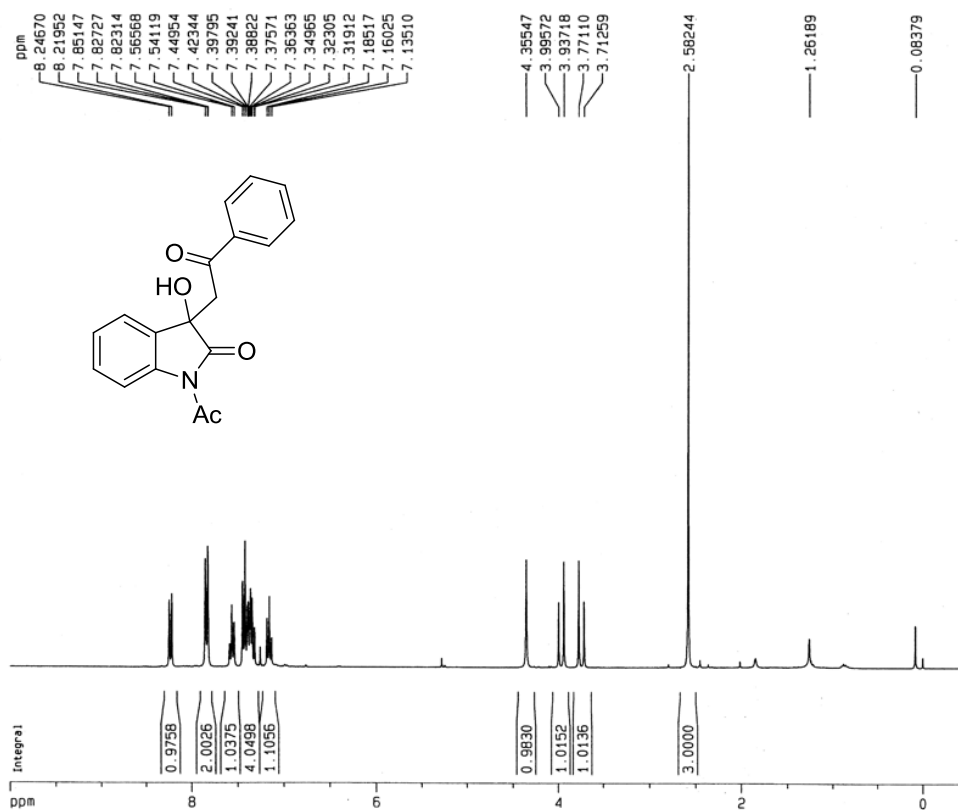

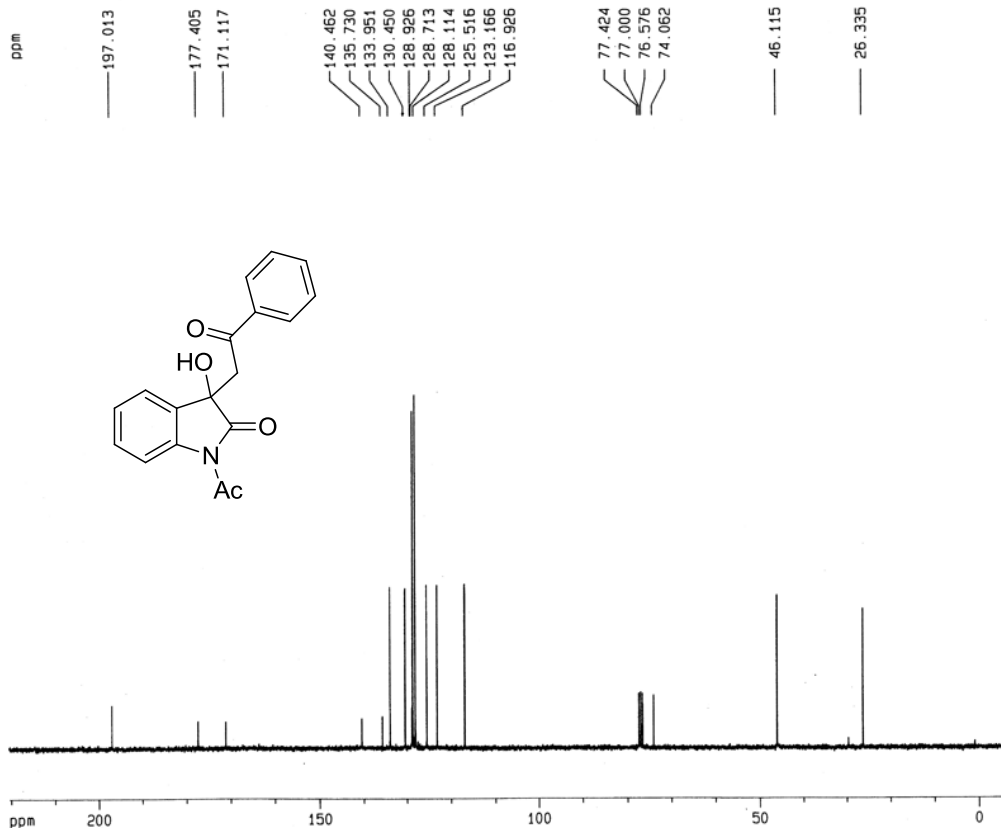

<sup>1</sup>H and <sup>13</sup>C NMR of 3b

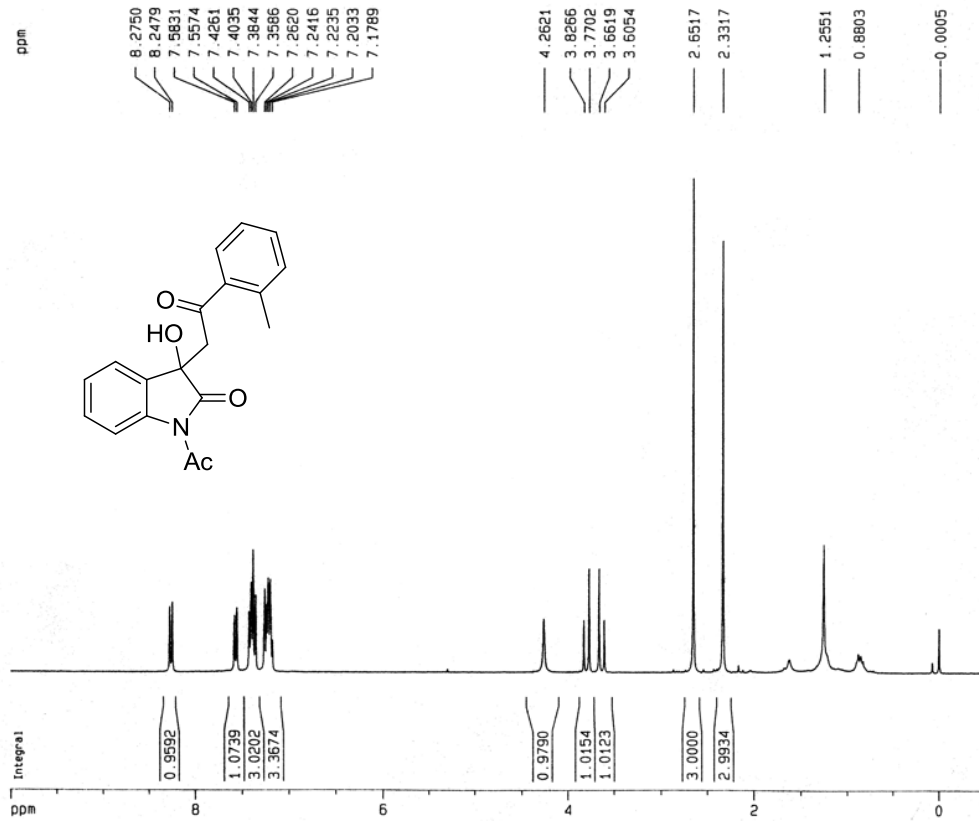

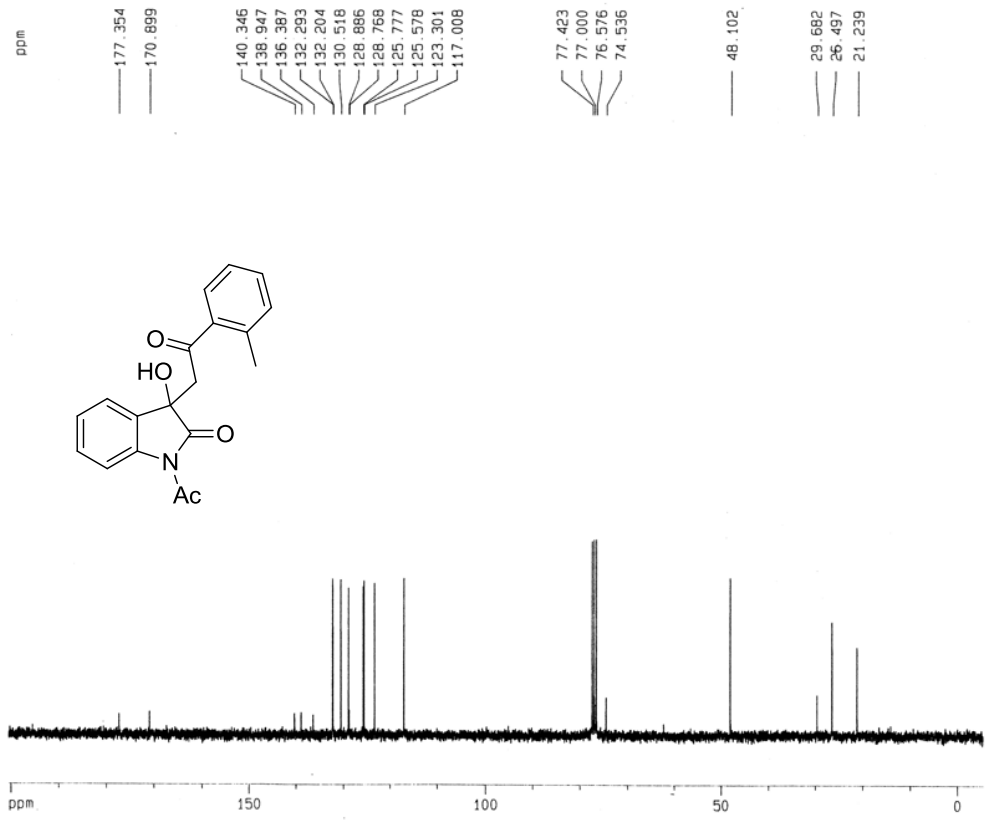

<sup>1</sup>H and <sup>13</sup>C NMR of 3c

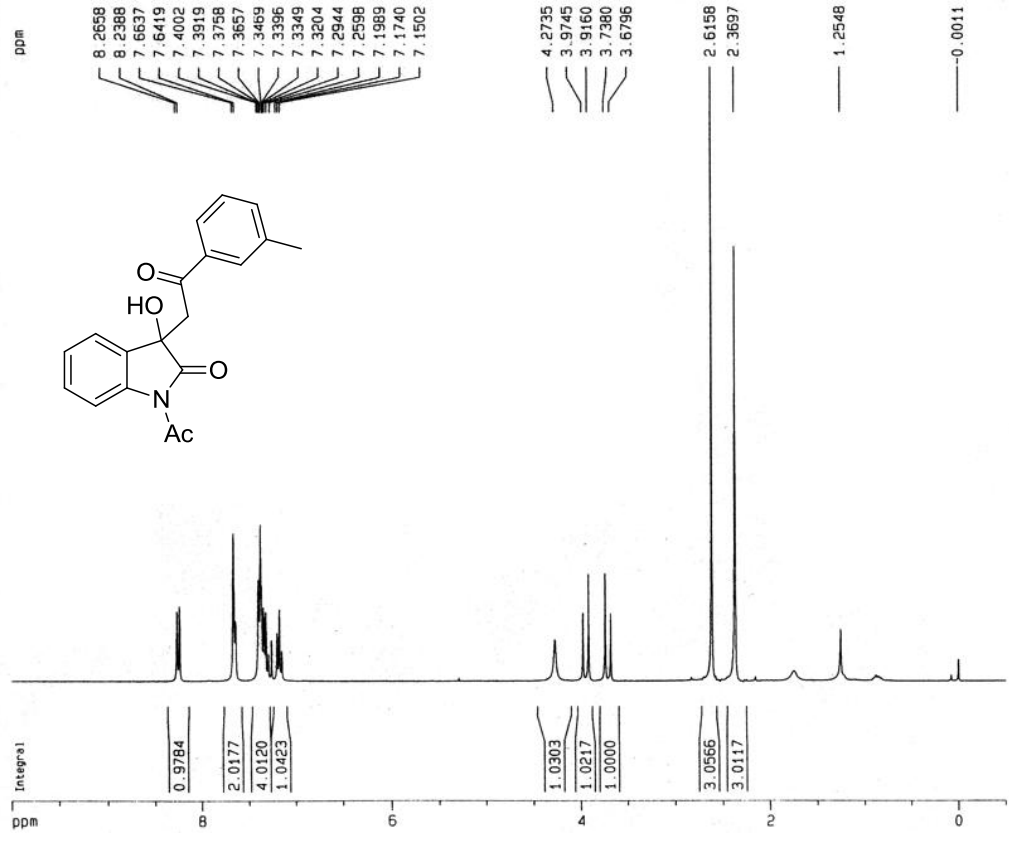

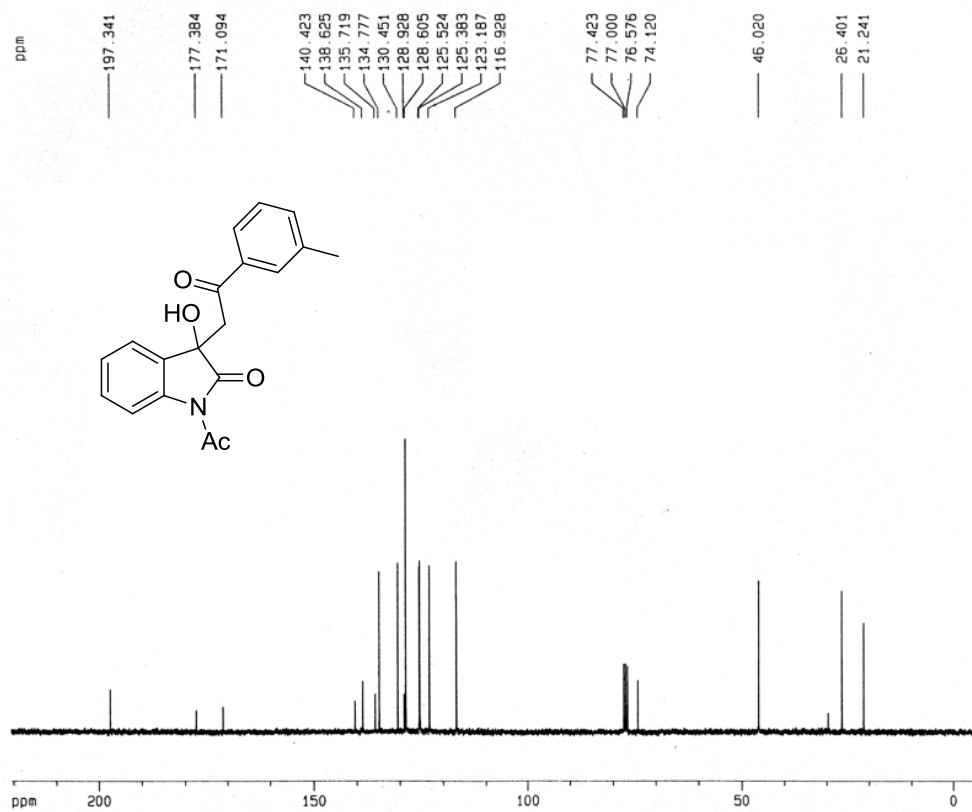

<sup>1</sup>H and <sup>13</sup>C NMR of 3d

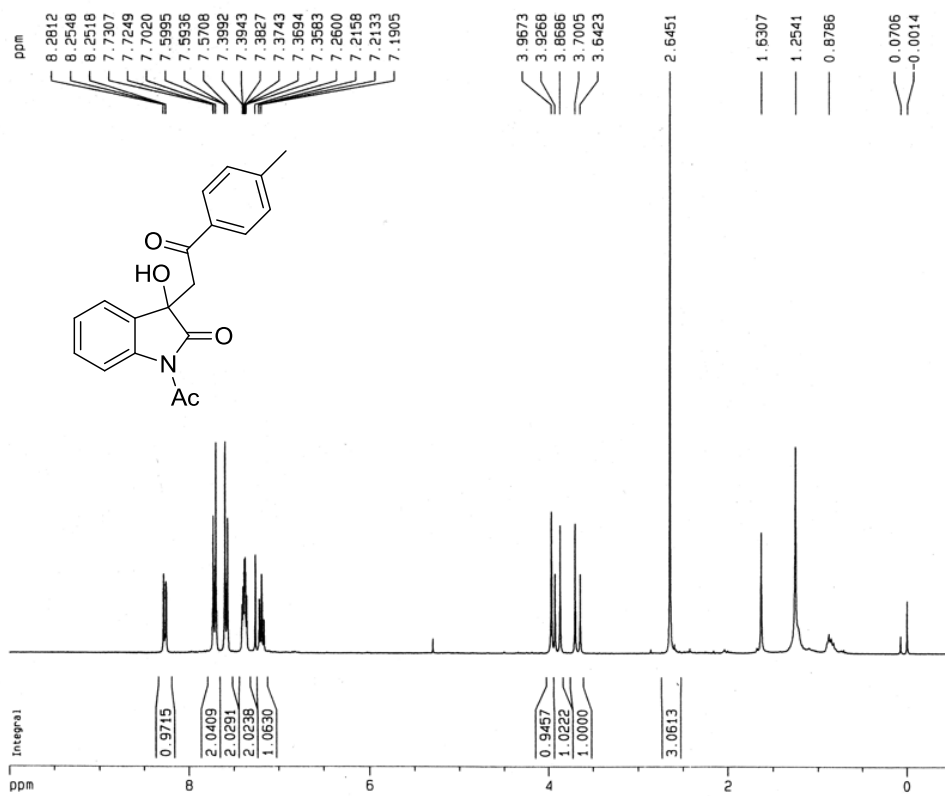

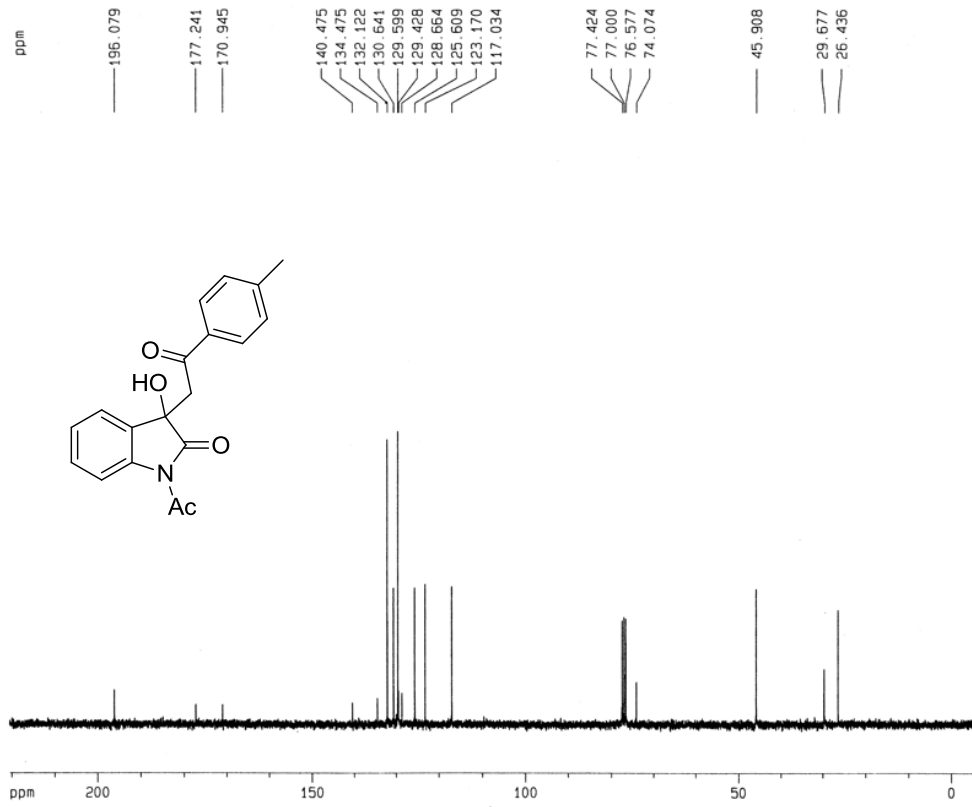

### <sup>1</sup>H and <sup>13</sup>C NMR of 3e

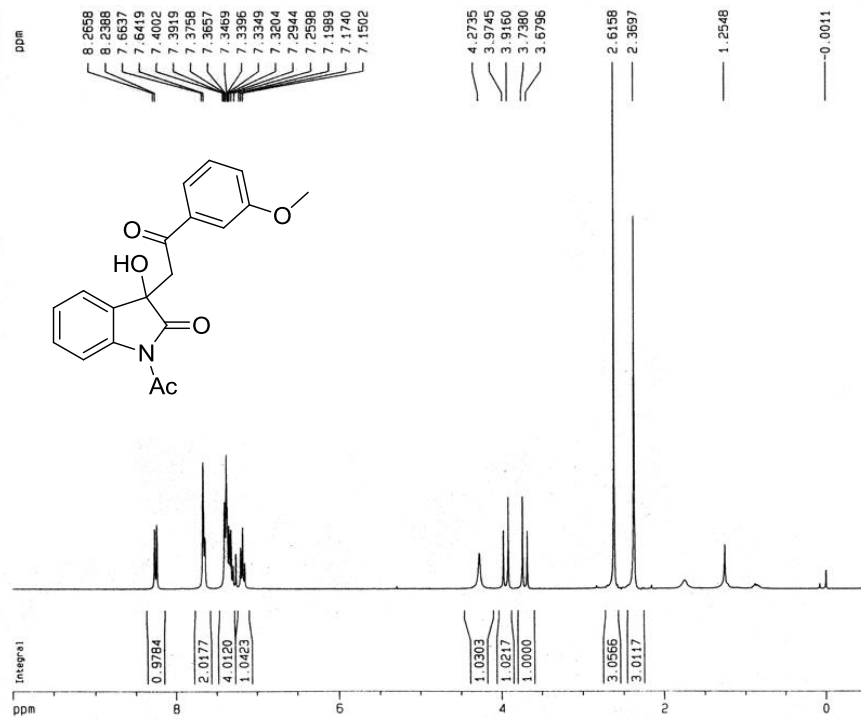

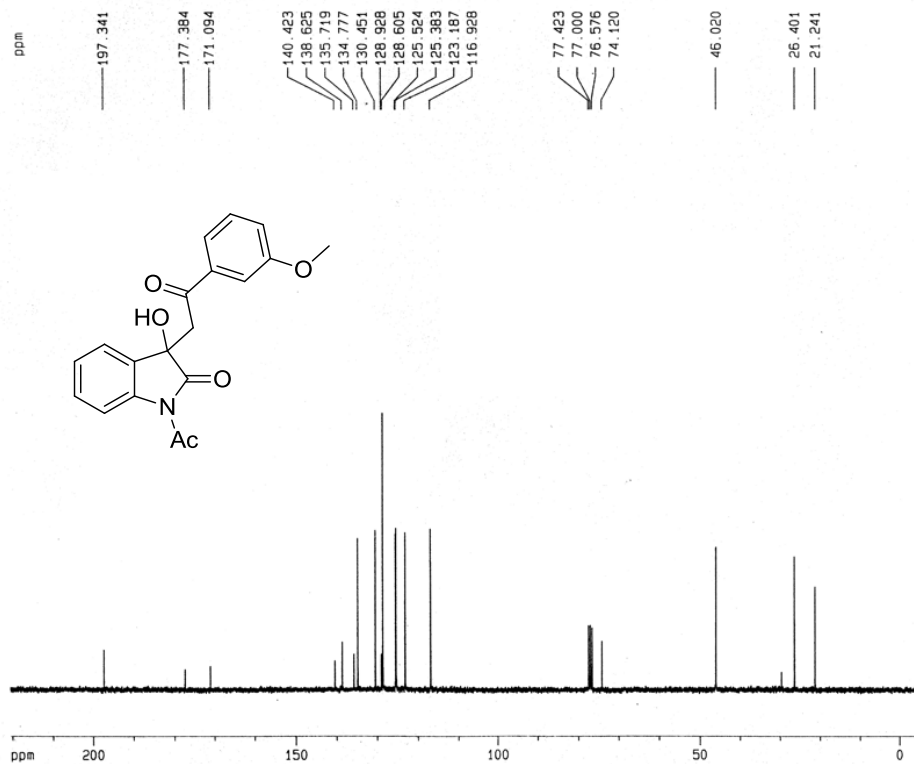

$^1\text{H}$  and  $^{13}\text{C}$  NMR of 3f

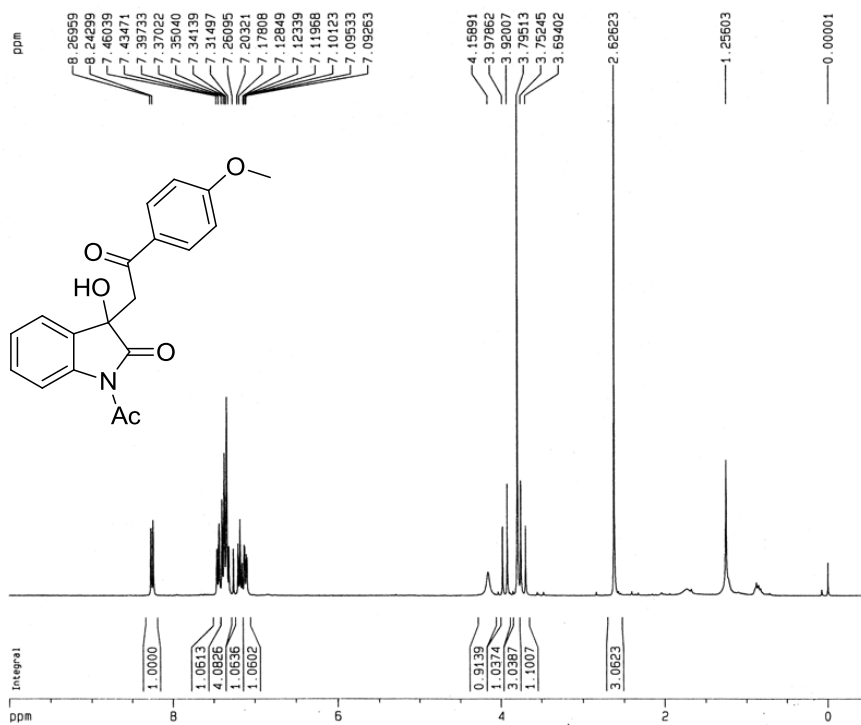



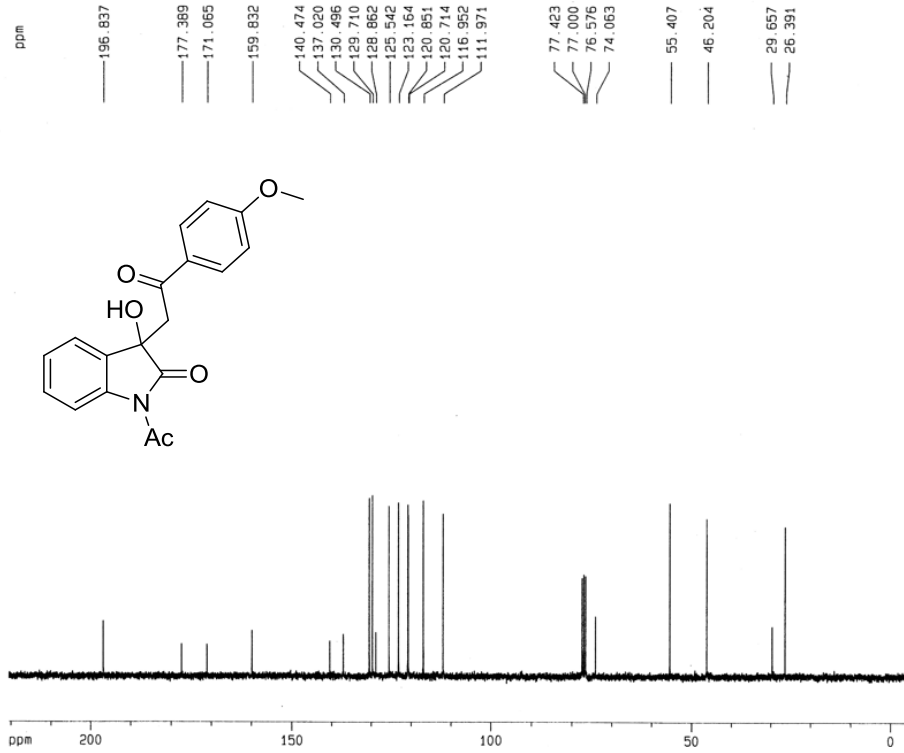

<sup>1</sup>H and <sup>13</sup>C NMR of 3g

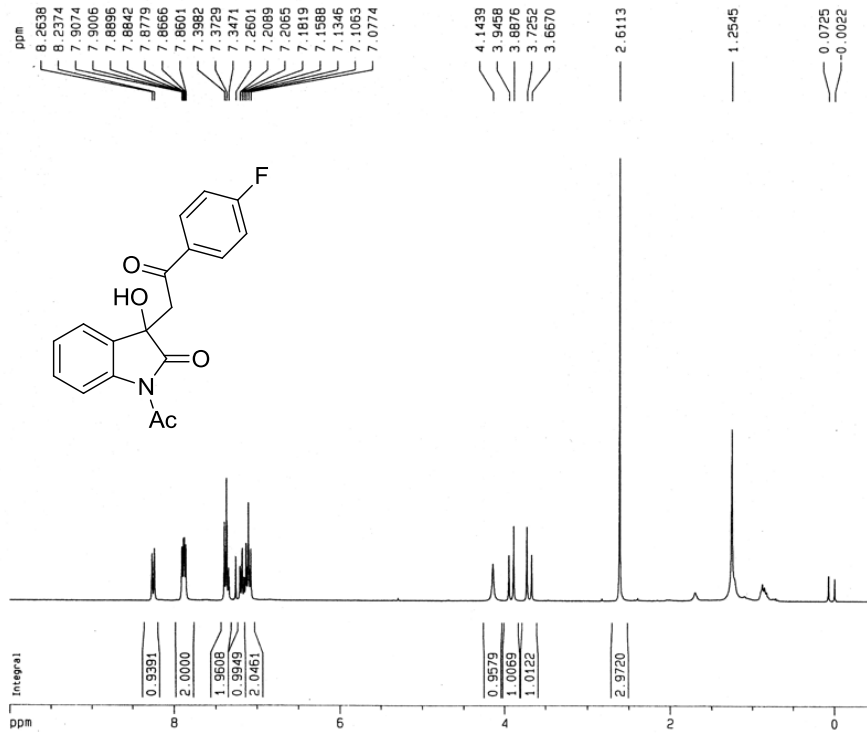

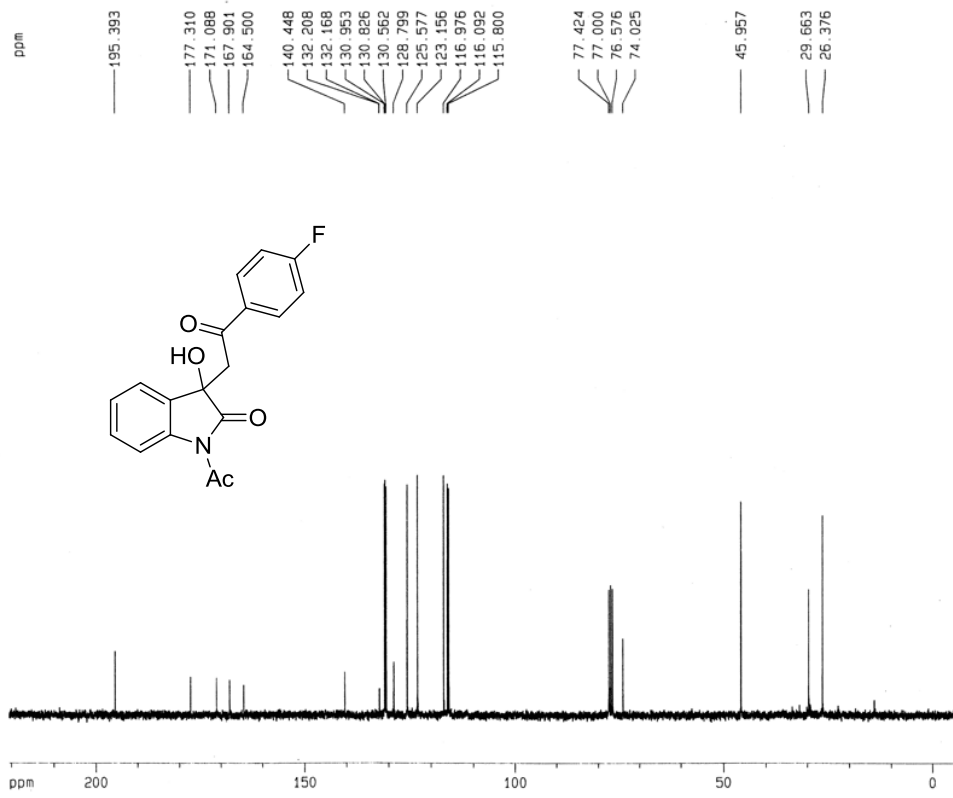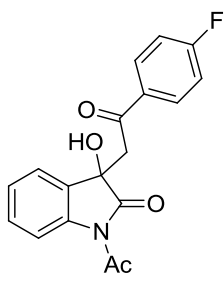

<sup>1</sup>H and <sup>13</sup>C NMR of 3h

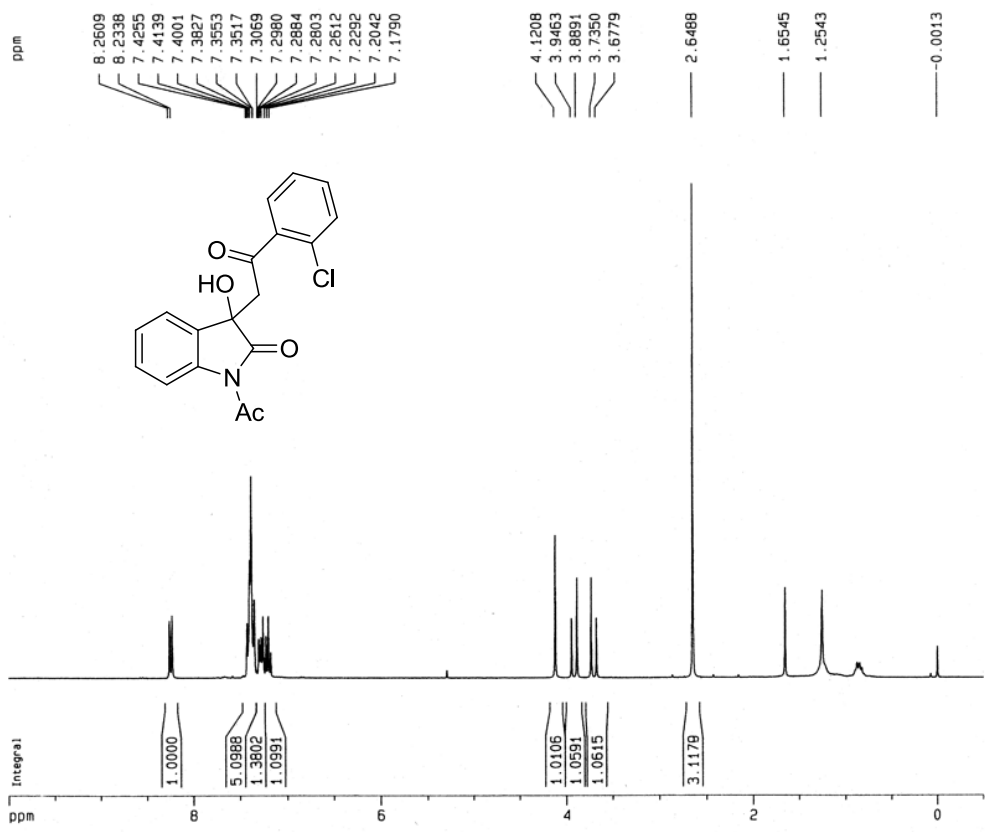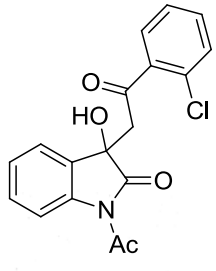

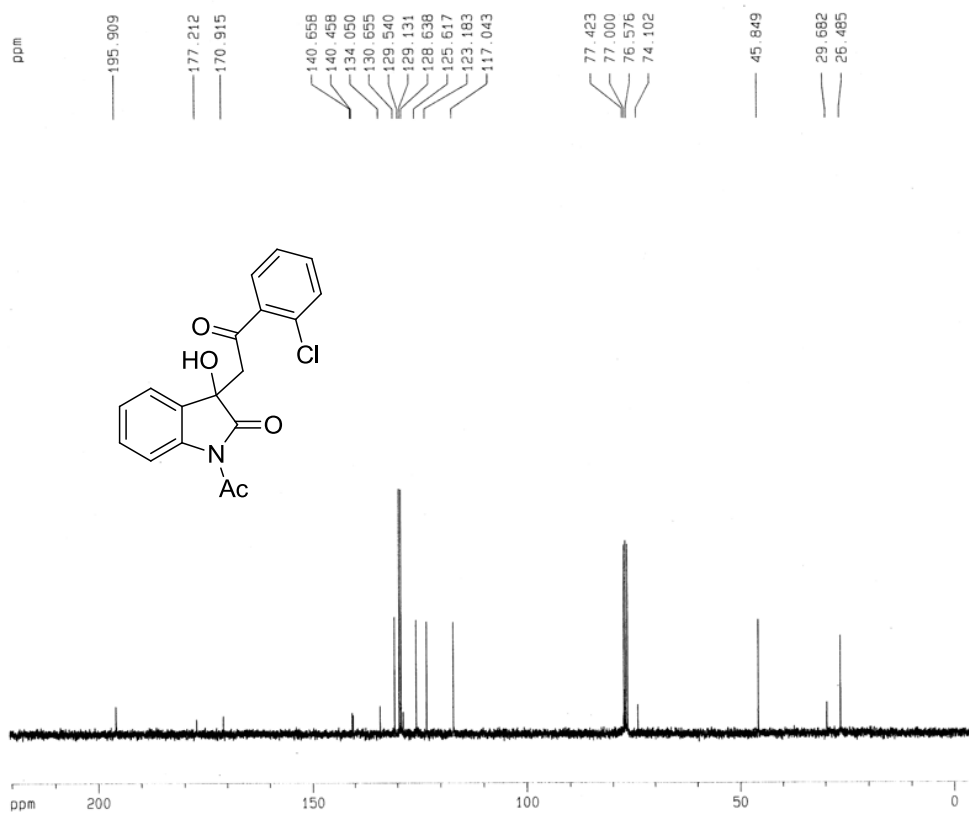

<sup>1</sup>H and <sup>13</sup>C NMR of 3i

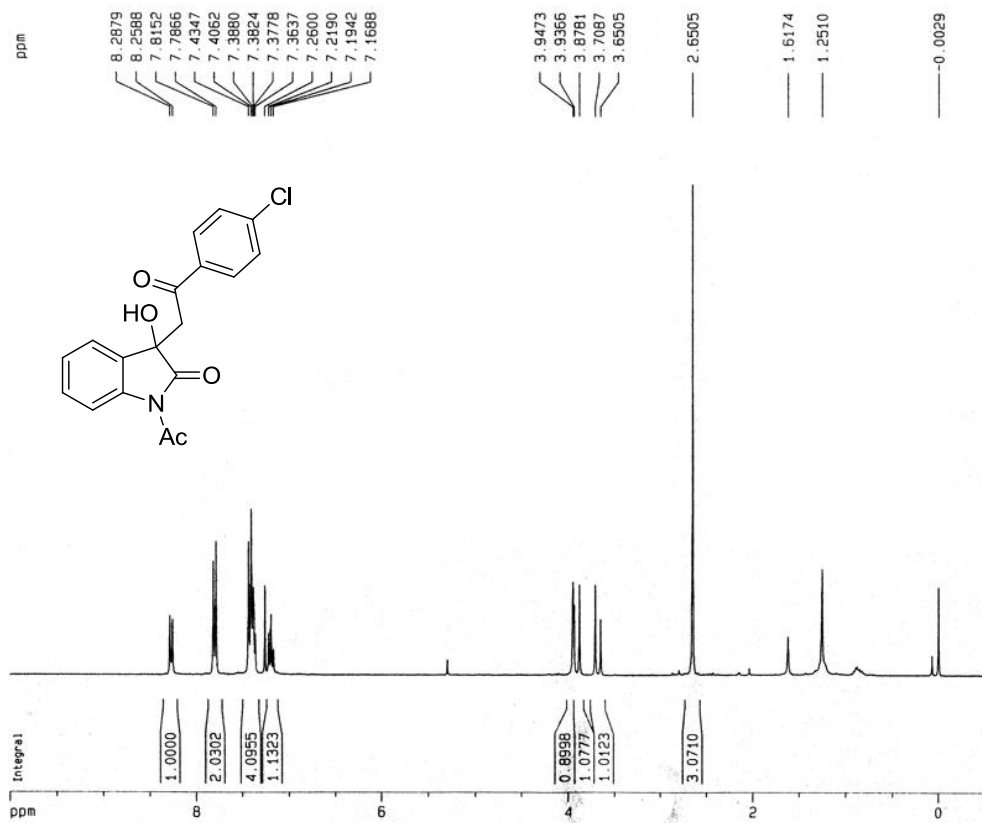

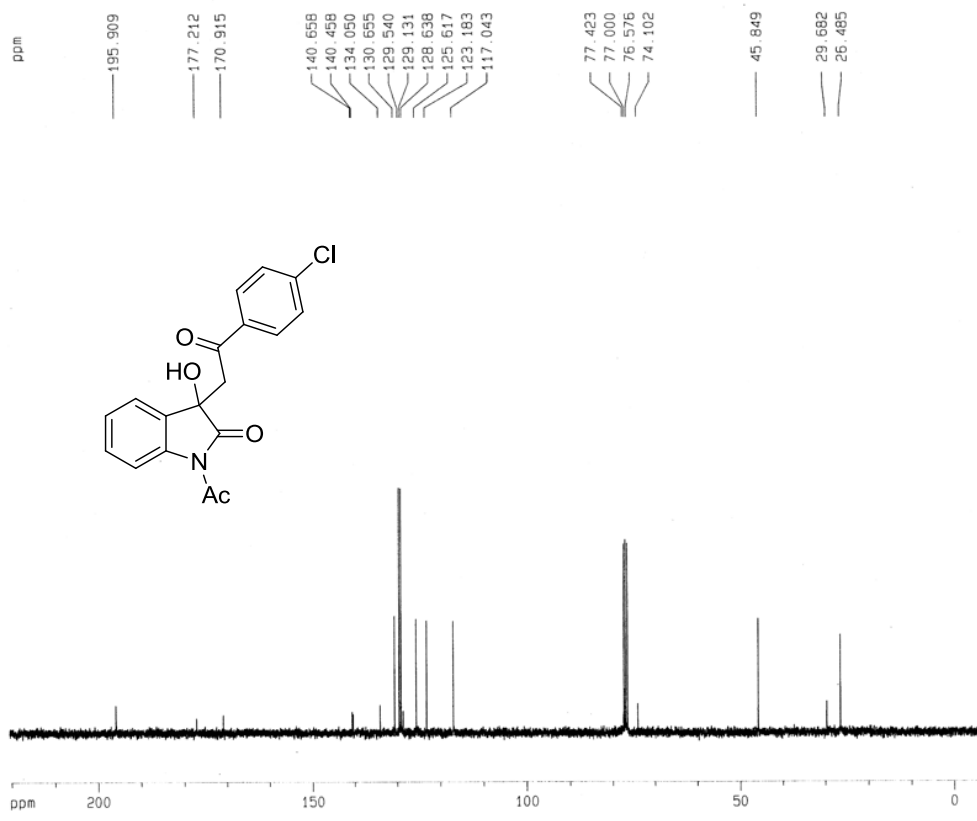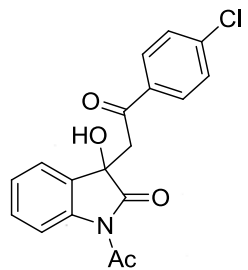

<sup>1</sup>H and <sup>13</sup>C NMR of 3j

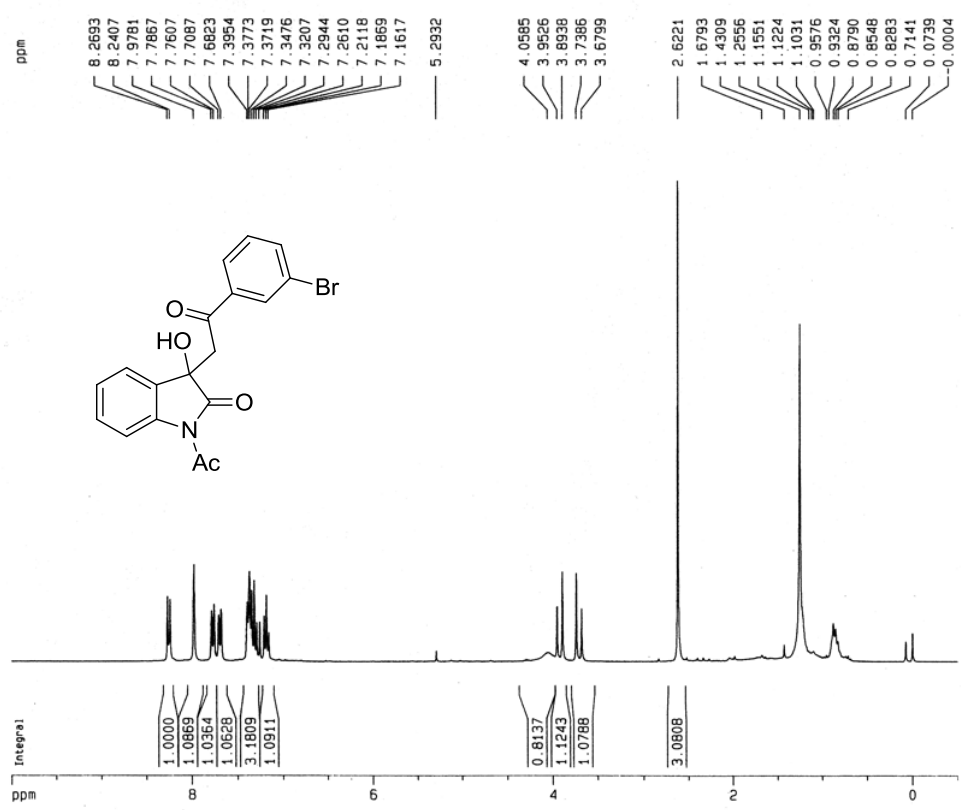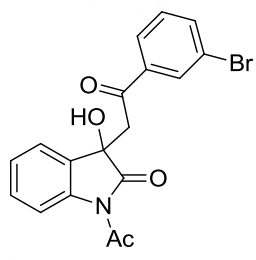

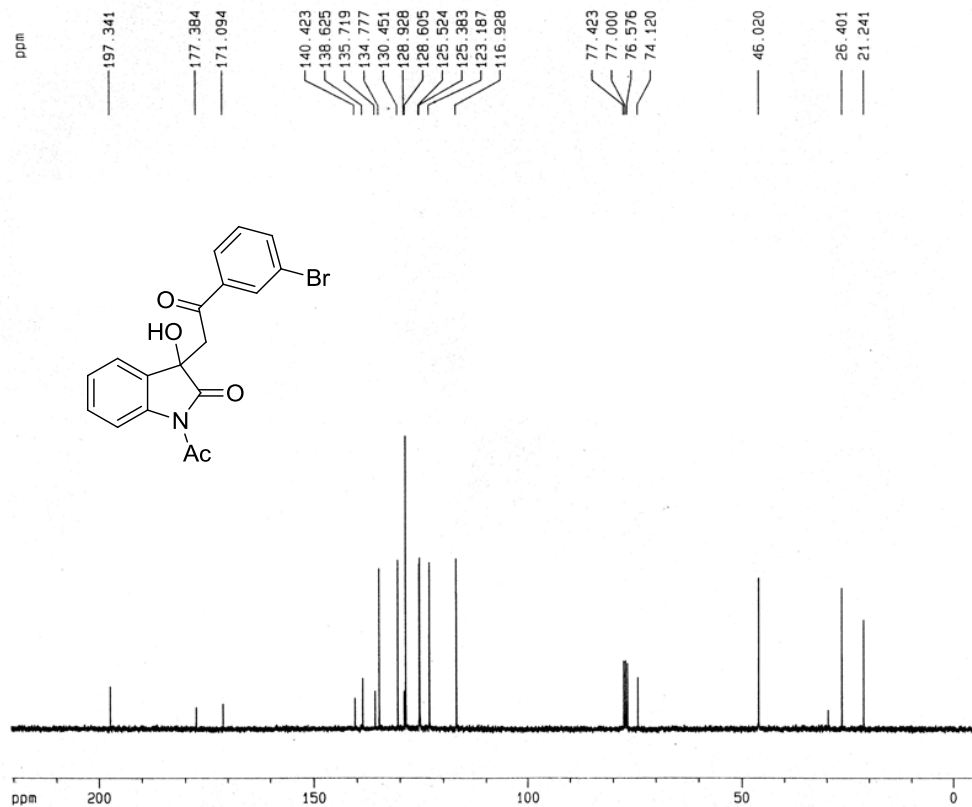

<sup>1</sup>H and <sup>13</sup>C NMR of 3k

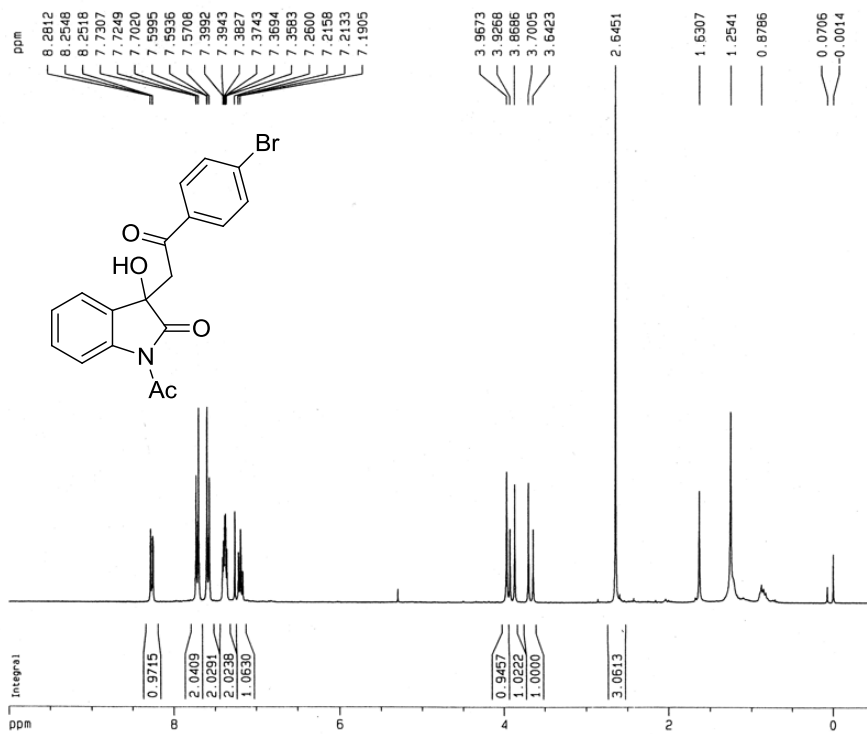

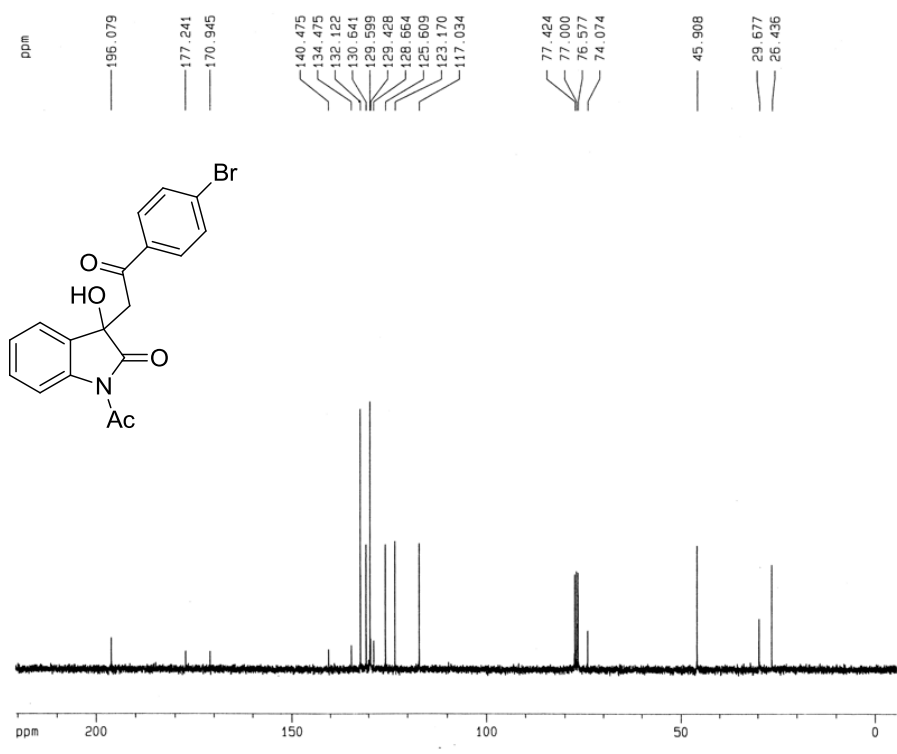

<sup>1</sup>H and <sup>13</sup>C NMR of 31

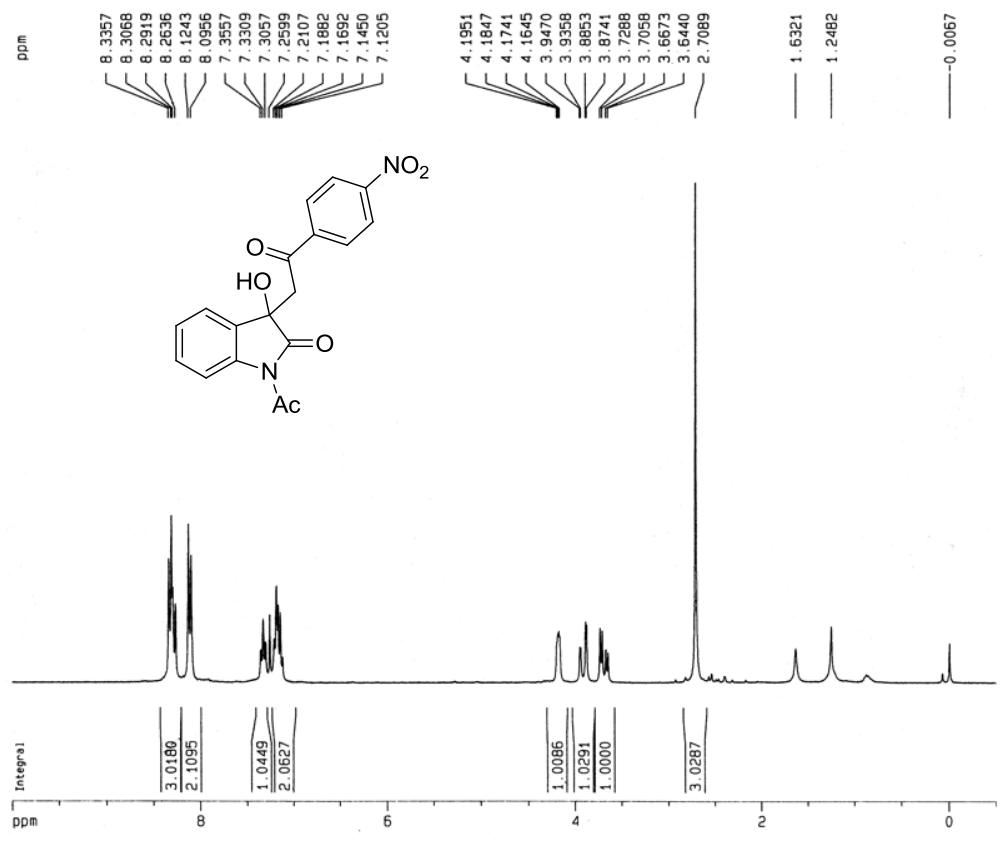

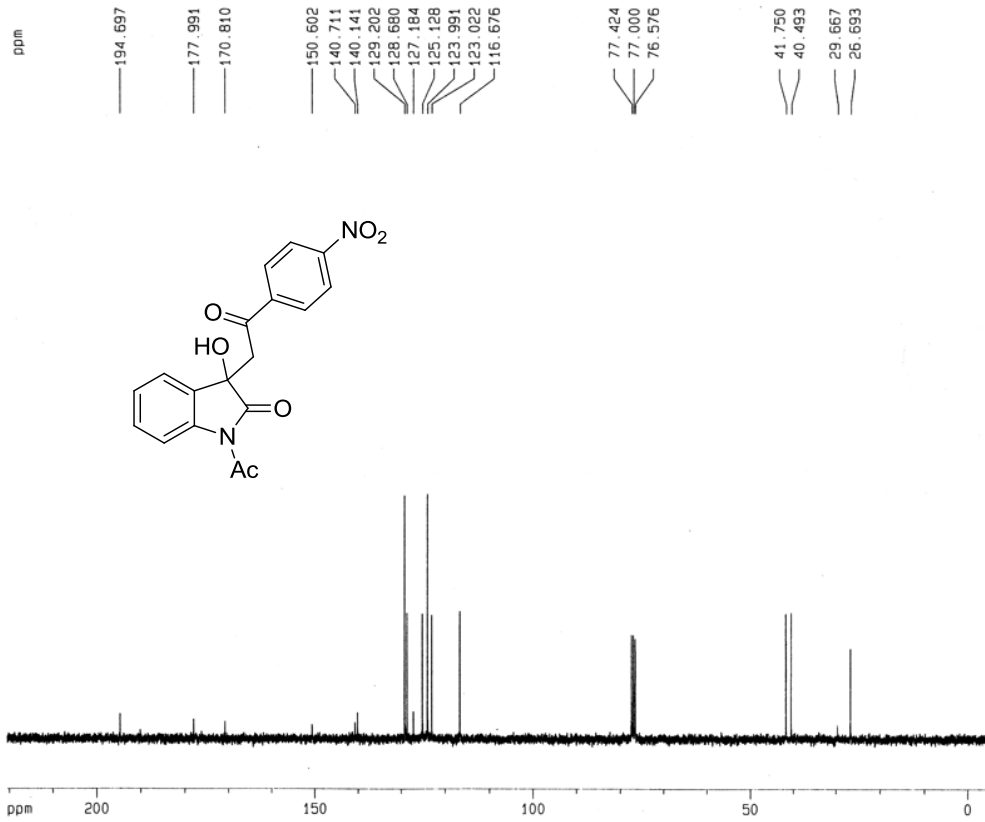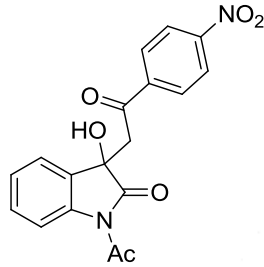

<sup>1</sup>H and <sup>13</sup>C NMR of 3m

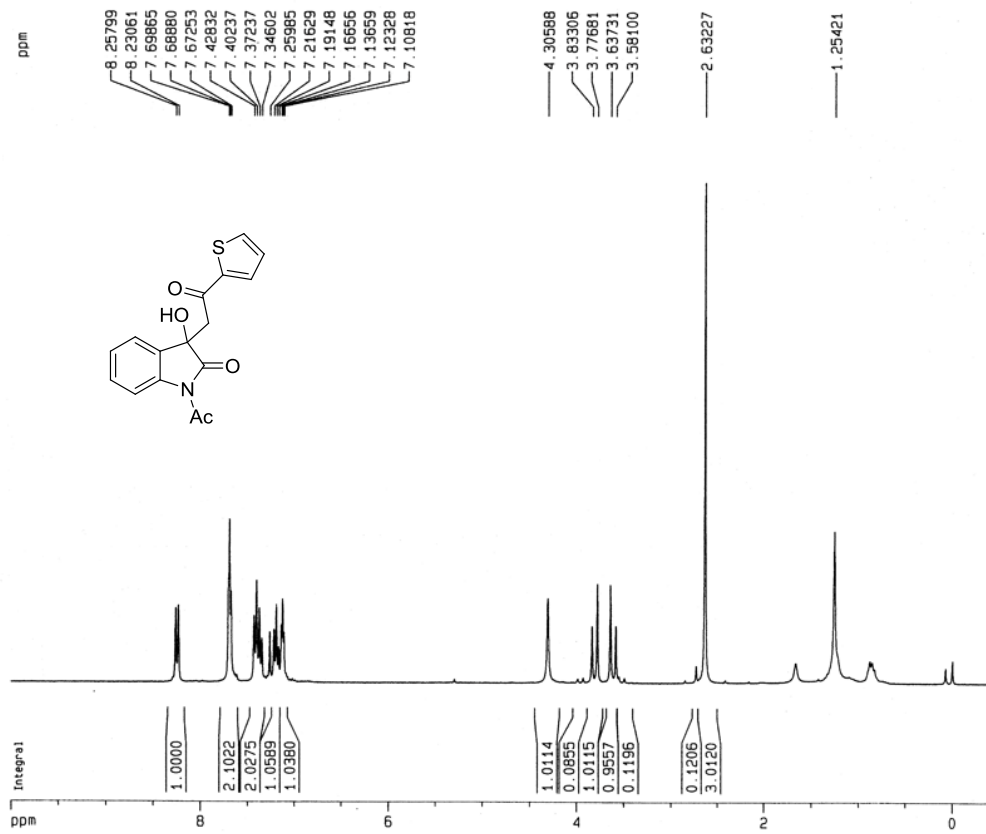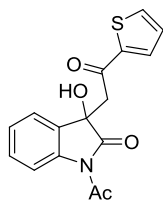

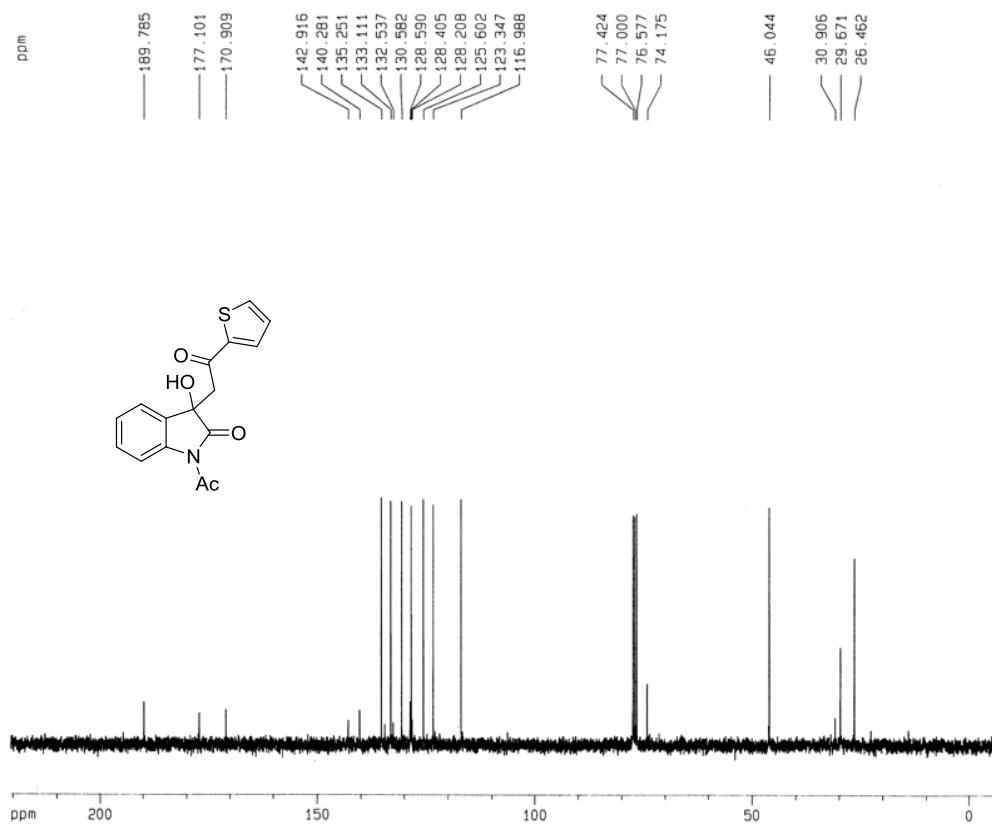

<sup>1</sup>H and <sup>13</sup>C NMR of 3n

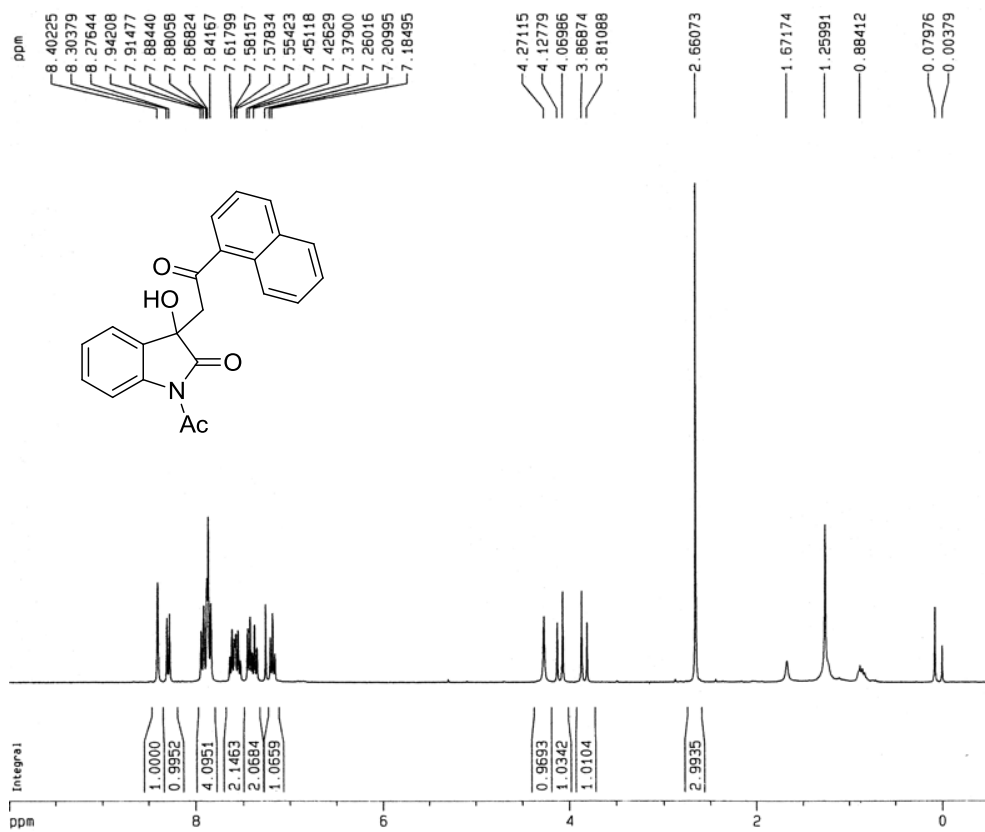



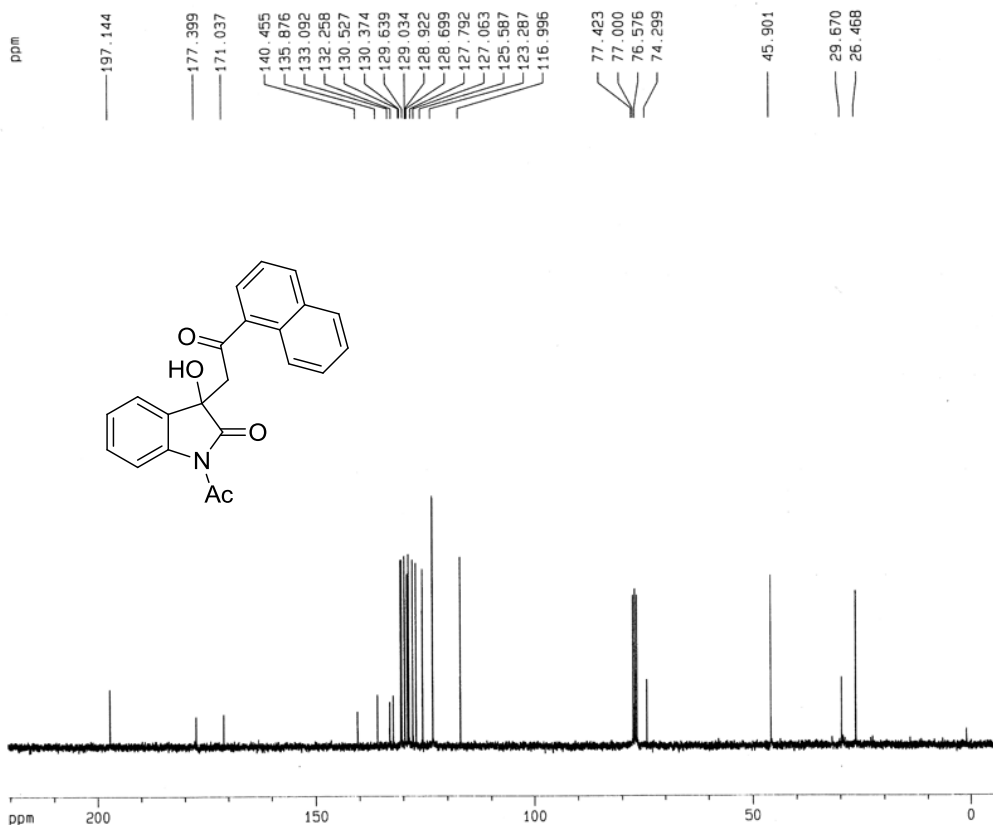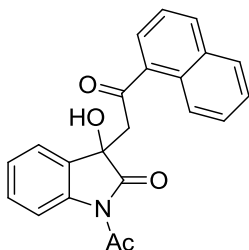

<sup>1</sup>H and <sup>13</sup>C NMR of 3o

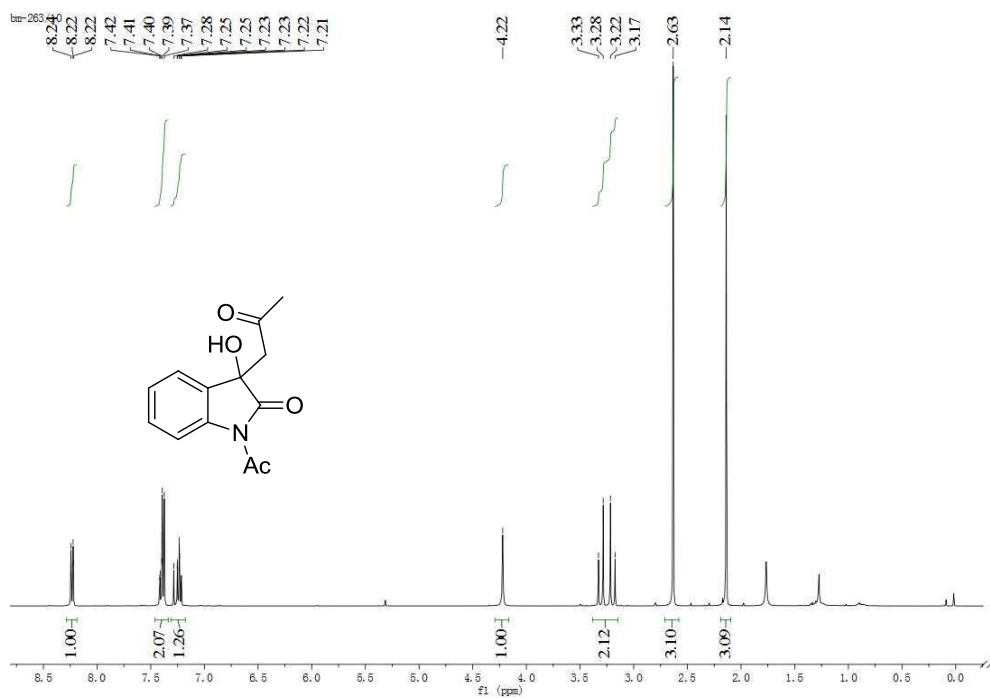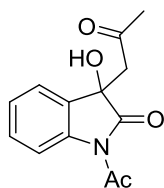

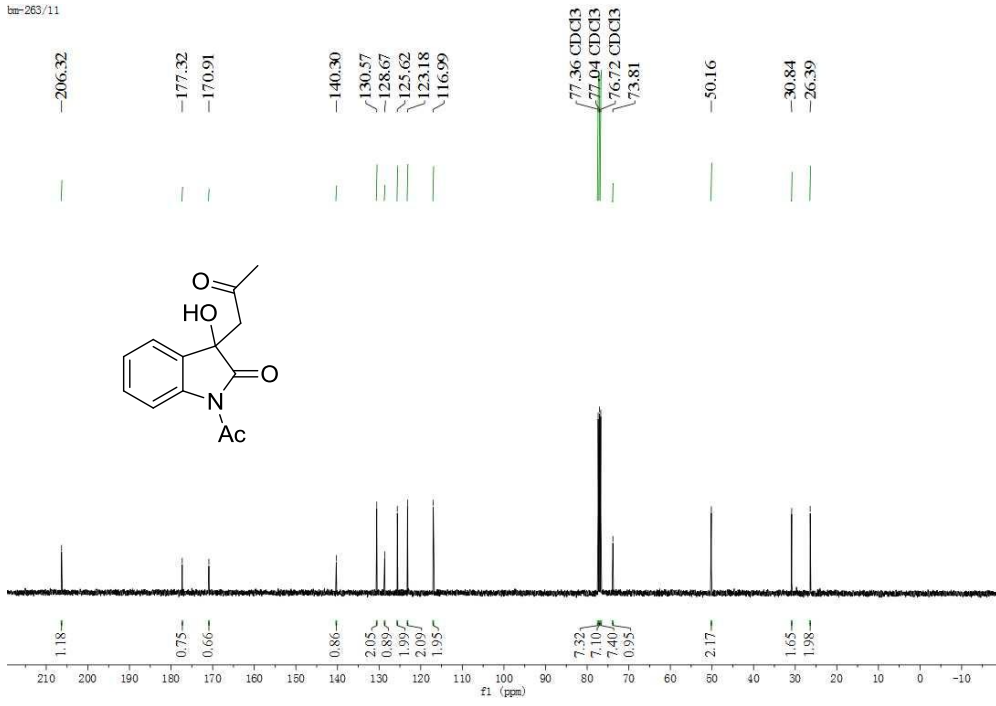

<sup>1</sup>H and <sup>13</sup>C NMR of 3p

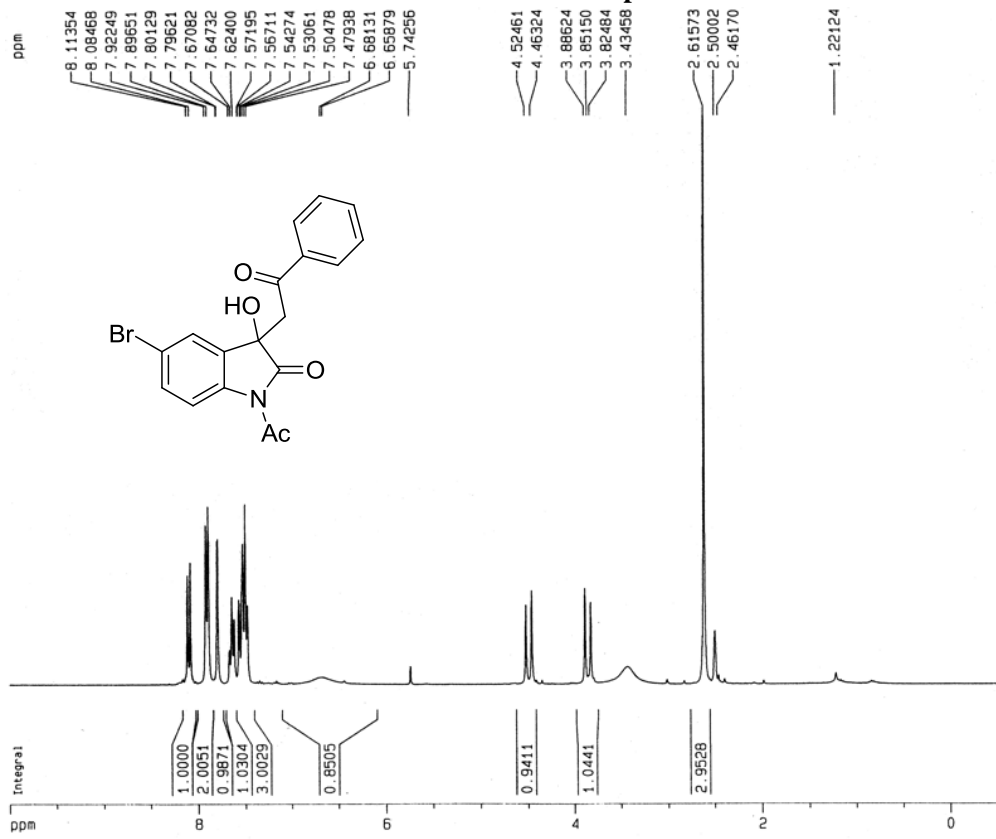

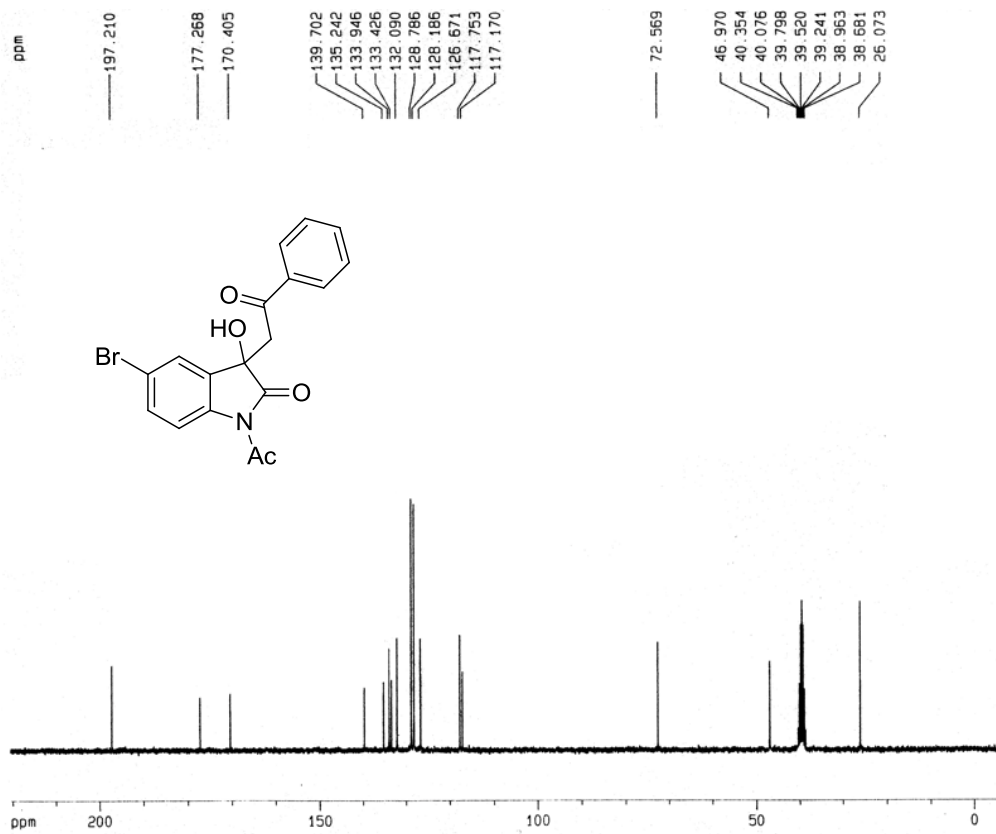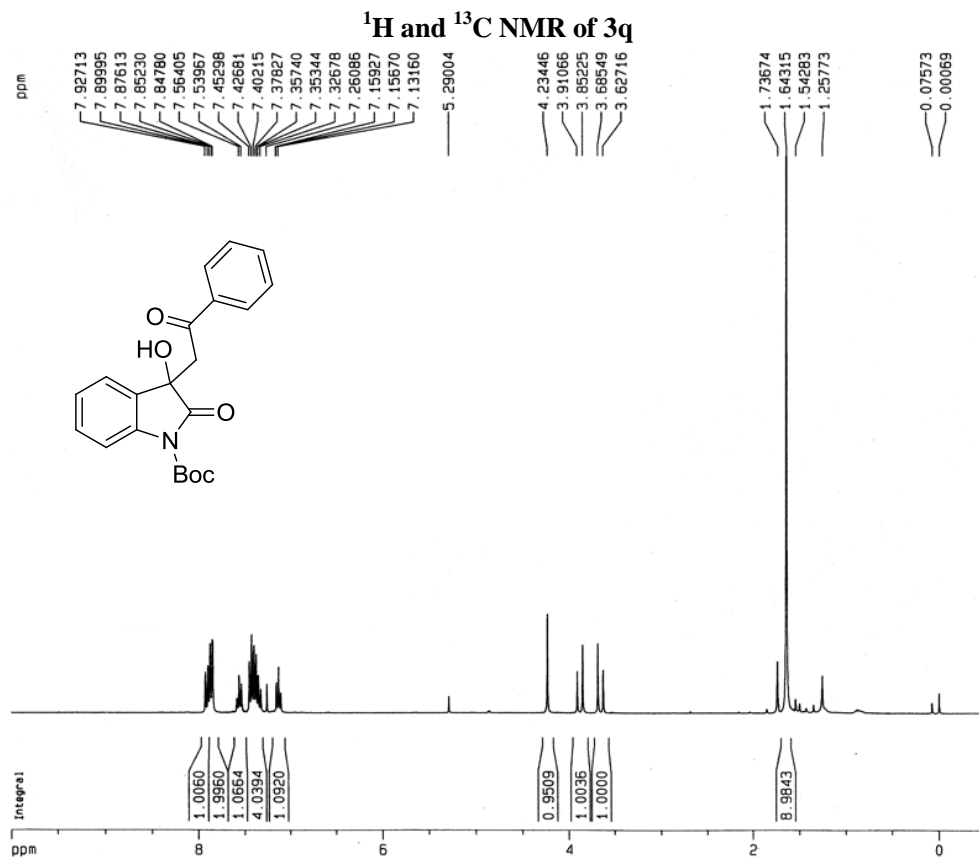

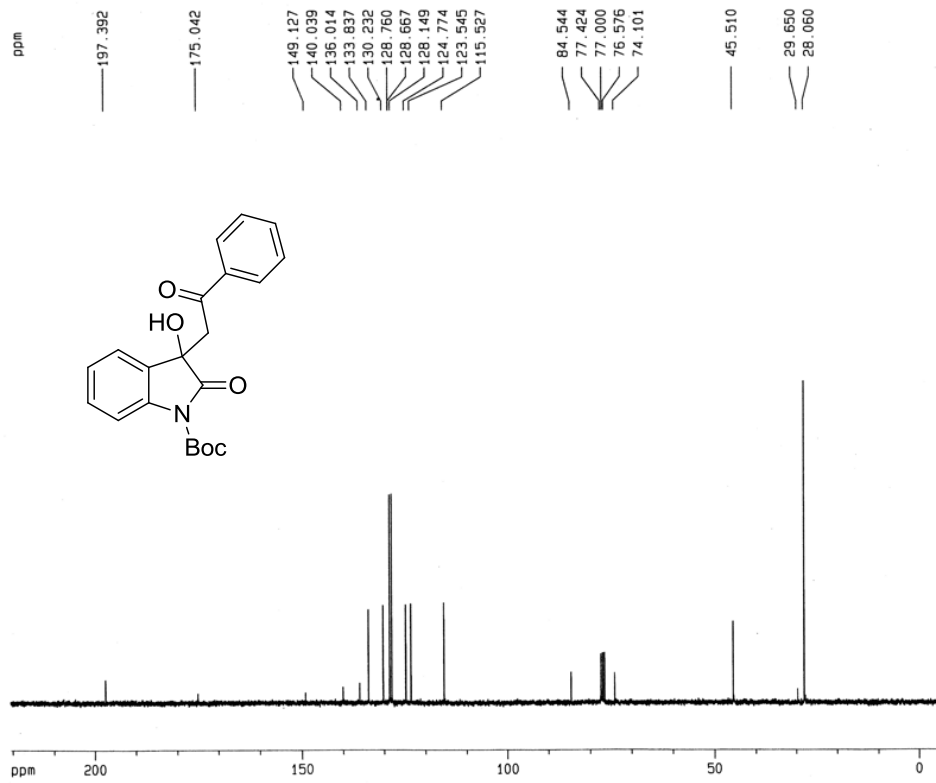

**<sup>1</sup>H and <sup>13</sup>C NMR of 3r**

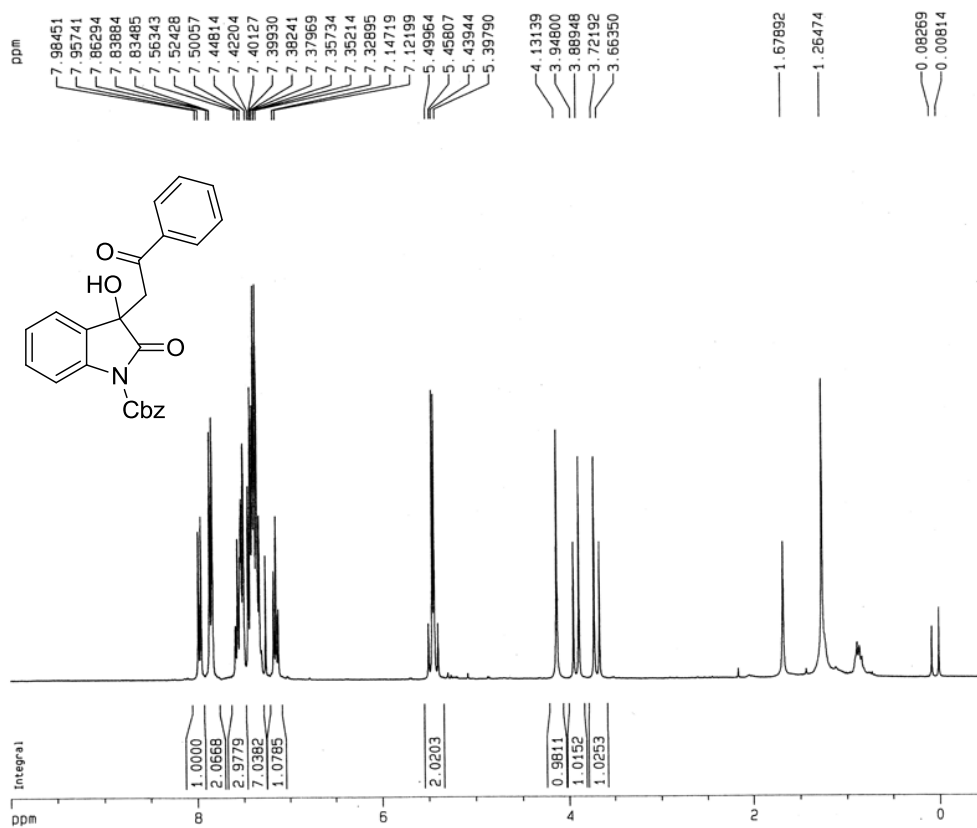

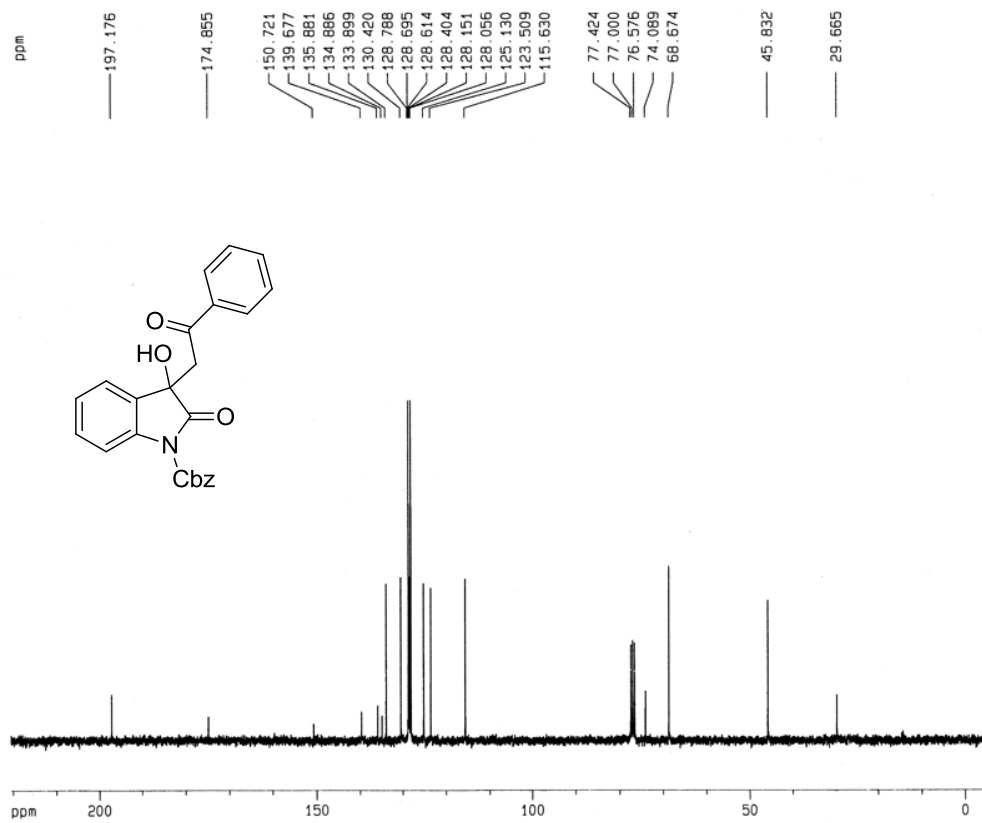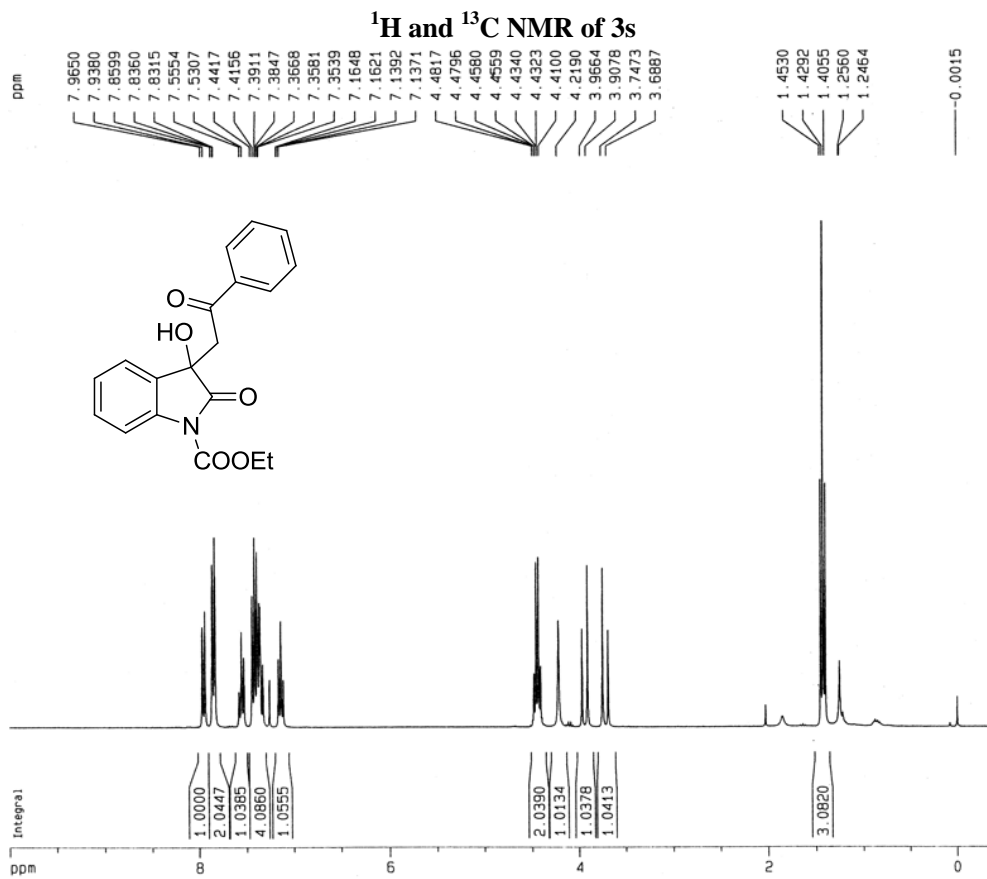

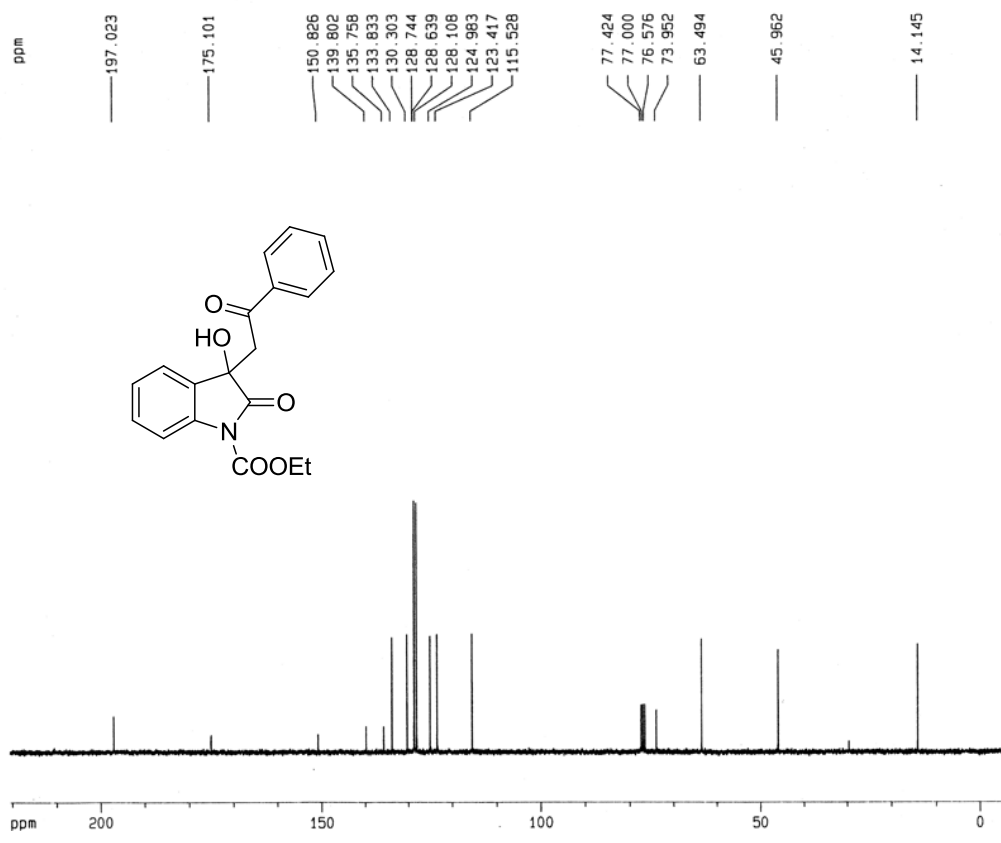

**<sup>1</sup>H and <sup>13</sup>C NMR of 3u**

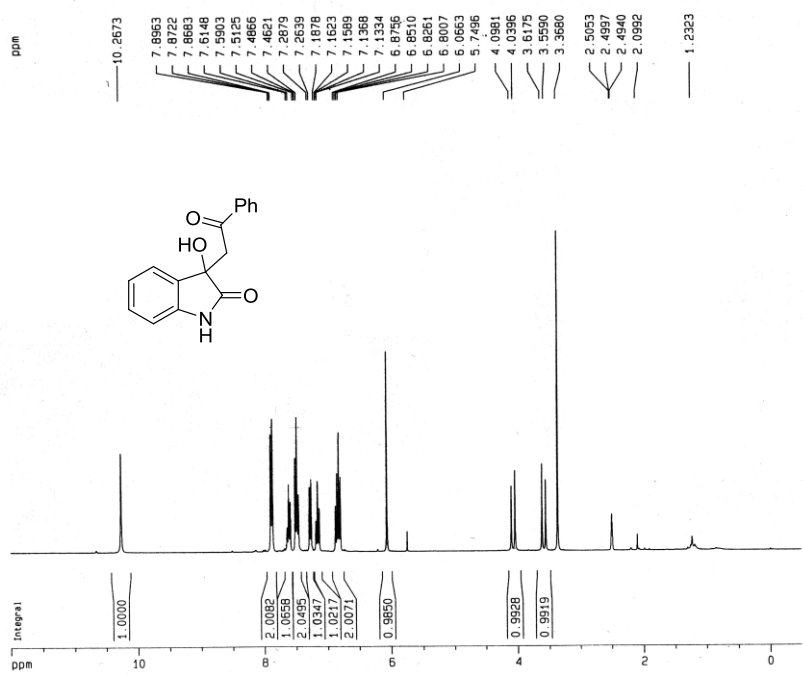

Supplement: c5ob02391b1.pdf [file c5ob02391b1.pdf]
